# Supplementary material
Source: publisher figshare collection journal article supplement (https://sage.figshare.com/ndownloader/files/13198676)
Supplement: Supplementary file 1 [file 13198676]

**Supplementary Table 1.** Incidence of serious infections.

|                               | SC IFNB-1a 44 µg  |                   | Alemtuzumab 12 mg |                   |                   |                   |                   |                   |                                            |
|-------------------------------|-------------------|-------------------|-------------------|-------------------|-------------------|-------------------|-------------------|-------------------|--------------------------------------------|
|                               | Year 1<br>(n=496) | Year 2<br>(n=459) | Year 1<br>(n=918) | Year 2<br>(n=917) | Year 3<br>(n=875) | Year 4<br>(n=824) | Year 5<br>(n=787) | Year 6<br>(n=766) | EAIR per 100<br>patient-years<br>Years 0–6 |
| Any event, n (%)              | 2 (0.4)           | 3 (0.7)           | 17 (1.9)          | 9 (1.0)           | 13 (1.5)          | 13 (1.6)          | 10 (1.3)          | 8 (1.0)           | 1.3                                        |
| Pneumonia                     | 0                 | 0                 | 0                 | 4 (0.4)           | 1 (0.1)           | 5 (0.6)           | 0                 | 1 (0.1)           | 0.2                                        |
| Varicella zoster <sup>a</sup> | 0                 | 0                 | 2 (0.2)           | 0                 | 2 (0.2)           | 1 (0.1)           | 3 (0.4)           | 0                 | 0.2                                        |
| Appendicitis                  | 0                 | 1 (0.2)           | 3 (0.3)           | 1 (0.1)           | 1 (0.1)           | 0                 | 0                 | 0                 | 0.1                                        |
| Gastroenteritis <sup>b</sup>  | 0                 | 0                 | 3 (0.3)           | 1 (0.1)           | 1 (0.1)           | 1 (0.1)           | 0                 | 1 (0.1)           | 0.1                                        |
| Sepsis                        | 0                 | 0                 | 0                 | 0                 | 3 (0.3)           | 1 (0.1)           | 1 (0.1)           | 0                 | 0.1                                        |
| Abscess bacterial             | 0                 | 0                 | 0                 | 0                 | 0                 | 1 (0.1)           | 0                 | 0                 | 0                                          |
| Anogenital warts              | 0                 | 0                 | 0                 | 0                 | 1 (0.1)           | 0                 | 0                 | 1 (0.1)           | 0                                          |
| Breast abscess                | 0                 | 0                 | 0                 | 0                 | 0                 | 0                 | 0                 | 1 (0.1)           | 0                                          |
| Catheter site infection       | 1 (0.2)           | 0                 | 0                 | 0                 | 0                 | 0                 | 0                 | 0                 | 0                                          |
| Cervicitis                    | 0                 | 0                 | 0                 | 0                 | 1 (0.1)           | 0                 | 0                 | 0                 | 0                                          |

|                                   |         |         |         |         |         |         |         |          |   |
|-----------------------------------|---------|---------|---------|---------|---------|---------|---------|----------|---|
| Diverticulitis                    | 0       | 0       | 0       | 0       | 0       | 0       | 0       | 1 (0.1)  | 0 |
| Disseminated tuberculosis         | 0       | 0       | 0       | 1 (0.1) | 0       | 0       | 0       | 0        | 0 |
| Endometritis                      | 0       | 0       | 0       | 0       | 0       | 1 (0.1) | 0       | 0        | 0 |
| Enterocolitis infectious          | 0       | 0       | 0       | 0       | 0       | 0       | 1 (0.1) | 0        | 0 |
| Esophageal candidiasis            | 0       | 0       | 1 (0.1) | 0       | 0       | 0       | 0       | 0        | 0 |
| Febrile infection                 | 0       | 0       | 1 (0.1) | 0       | 0       | 0       | 0       | 0        | 0 |
| <i>Helicobacter</i> infection     | 0       | 0       | 0       | 0       | 0       | 0       | 0       | 01 (0.1) | 0 |
| Hepatitis A                       | 1 (0.2) | 0       | 0       | 0       | 0       | 0       | 0       | 0        | 0 |
| Hepatitis C                       | 0       | 0       | 0       | 0       | 0       | 0       | 1 (0.1) | 0        | 0 |
| HIV infection                     | 0       | 0       | 0       | 0       | 0       | 0       | 1 (0.1) | 0        | 0 |
| Infection                         | 0       | 0       | 0       | 0       | 0       | 1 (0.1) | 0       | 0        | 0 |
| Infective myositis                | 0       | 0       | 0       | 0       | 1 (0.1) | 0       | 0       | 0        | 0 |
| Influenza                         | 0       | 0       | 0       | 1 (0.1) | 0       | 1 (0.1) | 0       | 0        | 0 |
| Injection-site abscess            | 0       | 1 (0.2) | 0       | 0       | 0       | 0       | 0       | 0        | 0 |
| Labyrinthitis                     | 0       | 0       | 1 (0.1) | 0       | 0       | 0       | 0       | 0        | 0 |
| Lower respiratory tract infection | 0       | 0       | 0       | 0       | 1 (0.1) | 0       | 0       | 0        | 0 |
| Meningitis herpes                 | 0       | 0       | 1 (0.1) | 0       | 0       | 0       | 0       | 0        | 0 |

|                                                |   |         |         |         |         |         |         |         |   |
|------------------------------------------------|---|---------|---------|---------|---------|---------|---------|---------|---|
| Pancreas infection                             | 0 | 0       | 0       | 0       | 0       | 1 (0.1) | 0       | 0       | 0 |
| <i>Pasteurella</i> infection                   | 0 | 0       | 1 (0.1) | 0       | 0       | 0       | 0       | 0       | 0 |
| Postoperative wound infection                  | 0 | 0       | 1 (0.1) | 0       | 0       | 0       | 0       | 0       | 0 |
| Post-procedural infections                     | 0 | 0       | 0       | 0       | 0       | 1 (0.1) | 0       | 0       | 0 |
| Pyelonephritis                                 | 0 | 0       | 0       | 1 (0.1) | 0       | 0       | 0       | 1 (0.1) | 0 |
| Pyelonephritis acute                           | 0 | 0       | 0       | 0       | 0       | 0       | 1 (0.1) | 0       | 0 |
| Pyelonephritis chronic                         | 0 | 1 (0.2) | 0       | 0       | 0       | 0       | 0       | 0       | 0 |
| Respiratory tract infection <sup>c</sup>       | 0 | 0       | 0       | 0       | 0       | 0       | 1 (0.1) | 0       | 0 |
| Sinusitis <sup>d</sup>                         | 0 | 0       | 0       | 0       | 0       | 1 (0.1) | 0       | 0       | 0 |
| Subcutaneous abscess                           | 0 | 0       | 0       | 0       | 1 (0.1) | 0       | 1 (0.1) | 0       | 0 |
| Tooth infection                                | 0 | 0       | 1 (0.1) | 1 (0.1) | 0       | 0       | 0       | 0       | 0 |
| Upper respiratory tract infection <sup>e</sup> | 0 | 0       | 1 (0.1) | 0       | 0       | 0       | 0       | 0       | 0 |
| Urinary tract infection <sup>f</sup>           | 0 | 0       | 1 (0.1) | 0       | 0       | 0       | 0       | 1 (0.1) | 0 |
| Uterine infection                              | 0 | 0       | 1 (0.1) | 0       | 0       | 0       | 0       | 0       | 0 |
| Varicella                                      | 0 | 0       | 1 (0.1) | 0       | 0       | 0       | 0       | 0       | 0 |
| Viral infection                                | 0 | 0       | 0       | 0       | 0       | 1 (0.1) | 0       | 0       | 0 |

SC IFNB-1a: subcutaneous interferon beta-1a; EAIR: exposure-adjusted incidence rate per 100 patient-years; (Number of patients with a specific event divided by total exposure time among patients at risk of an initial occurrence of the event) x 100.

Percentage is based on number of patients having an adverse event in the reported year divided by the total number of patients followed up in that year.

<sup>a</sup>Includes preferred terms “herpes zoster” and “herpes zoster multidermatomal”.

<sup>b</sup>Includes preferred terms “gastroenteritis” and “gastroenteritis viral”.

<sup>c</sup>Includes preferred terms “respiratory tract infection” and “respiratory tract infection viral”.

<sup>d</sup>Includes preferred terms “sinusitis” and “acute sinusitis”.

<sup>e</sup>Includes preferred terms “upper respiratory tract infection” and “viral upper respiratory tract infection”.

<sup>f</sup>Includes preferred terms “urinary tract infection” and “*Escherichia* urinary tract infection” and “urinary tract infection bacterial”.

**Supplementary Table 2.** Infection incidences in patients who received exactly 2 courses of alemtuzumab 12 mg<sup>a</sup> compared with the overall cohort of alemtuzumab 12-mg–treated patients.

|                                                                    | Year 1           | Year 2           | Year 3           | Year 4           | Year 5           | Year 6           | EAIR per 100<br>patient-years<br>Years 0–6 |
|--------------------------------------------------------------------|------------------|------------------|------------------|------------------|------------------|------------------|--------------------------------------------|
| Patients who received<br>exactly 2 courses of<br>alemtuzumab 12 mg | ( <i>n</i> =547) | ( <i>n</i> =547) | ( <i>n</i> =516) | ( <i>n</i> =470) | ( <i>n</i> =442) | ( <i>n</i> =428) |                                            |
| All alemtuzumab 12 mg-<br>treated patients                         | ( <i>n</i> =918) | ( <i>n</i> =917) | ( <i>n</i> =875) | ( <i>n</i> =824) | ( <i>n</i> =787) | ( <i>n</i> =766) |                                            |
| Any infection, <i>n</i> (%)                                        | 317 (58.0)       | 289 (52.8)       | 227 (44.0)       | 190 (40.4)       | 169 (38.2)       | 159 (37.1)       | 50.14                                      |
|                                                                    | 539 (58.7)       | 482 (52.6)       | 408 (46.6)       | 353 (42.8)       | 322 (40.9)       | 292 (38.1)       | 50.85                                      |
| Grade 1                                                            | 157 (28.7)       | 163 (29.8)       | 112 (21.7)       | 93 (19.8)        | 89 (20.1)        | 70 (16.4)        | 20.02                                      |
|                                                                    | 282 (30.7)       | 260 (28.4)       | 185 (21.1)       | 170 (20.6)       | 155 (19.7)       | 125 (16.3)       | 19.68                                      |
| Grade 2                                                            | 241 (44.1)       | 199 (36.4)       | 159 (30.8)       | 143 (30.4)       | 110 (24.9)       | 118 (27.6)       | 31.37                                      |
|                                                                    | 403 (43.9)       | 348 (37.9)       | 295 (33.7)       | 262 (31.8)       | 227 (28.8)       | 215 (28.1)       | 32.34                                      |
| Grade 3                                                            | 14 (2.6)         | 8 (1.5)          | 5 (1.0)          | 6 (1.3)          | 3 (0.7)          | 5 (1.2)          | 1.31                                       |
|                                                                    | 17 (1.9)         | 13 (1.4)         | 11 (1.3)         | 9 (1.1)          | 8 (1.0)          | 9 (1.2)          | 1.25                                       |
| Grade 4                                                            | 0                | 1 (0.2)          | 0                | 1 (0.2)          | 0                | 0                | 0.07                                       |

|                                     |          |         |          |          |          |         |      |
|-------------------------------------|----------|---------|----------|----------|----------|---------|------|
|                                     | 0        | 1 (0.1) | 0        | 2 (0.2)  | 0        | 0       | 0.06 |
| Grade 5                             | 0        | 0       | 1 (0.2)  | 0        | 0        | 0       | 0.03 |
|                                     | 0        | 0       | 1 (0.1)  | 0        | 0        | 0       | 0.02 |
| Leading to study discontinuation    | 0        | 0       | 0        | 0        | 0        | 0       | 0    |
|                                     | 0        | 0       | 0        | 0        | 0        | 0       | 0    |
| Leading to study withdrawal         | 0        | 0       | 0        | 0        | 1 (0.2)  | 0       | 0.03 |
|                                     | 0        | 0       | 0        | 0        | 1 (0.1)  | 0       | 0.02 |
| Any serious infection, <i>n</i> (%) | 13 (2.4) | 7 (1.3) | 7 (1.4)  | 9 (1.9)  | 3 (0.7)  | 3 (0.7) | 1.39 |
|                                     | 17 (1.9) | 9 (1.0) | 13 (1.5) | 13 (1.6) | 10 (1.3) | 8 (1.0) | 1.26 |

EAIR: exposure-adjusted incidence rate per 100 patient-years; (Number of patients with a specific event divided by total exposure time among patients at risk of an initial occurrence of the event) x 100.

Percentage is based on number of patients having an adverse event in the reported year divided by the total number of patients followed up in that year.

<sup>a</sup>Patients could have received another disease-modifying therapy.
